# Supplementary material
Source: publisher figshare collection journal article supplement (https://sage.figshare.com/ndownloader/files/14878049)
Supplement: Supplementary file 1 [file 14878049]

**Frailty Prevalence supplementary materials**

**Supplementary material 1: Frailty Index**

| **Frailty Index** | | |
| --- | --- | --- |
| Depression  Anxiety  Polypharmacy  Hypertension  Atrial Fibrilation  Previous cerebrovascualar disease  Diabetes  Vascular disease  Hyperlipidaemia  Heart failure  Previous Myocardial infarction | Haemoglobin (low)  Care-home resident  Carers  Hearing aid  Sensory impairment (e.g. blind/deaf)  Continence bladder  Continence bowel  Falls  Fracture  Chronic Obstructive Pulmonary Disease  Cancer | Liver disease  Peptic ulcer  Arthritis  Impaired external ADL  Impaired ADL  Mobility aid  Assistance walking  Calcium  Albumin (low)  High glucose  Renal failure |

**Supplementary material 2: Logistic regression output of the ‘Frail Non-disabled’ questionnaire and stroke severity (NIHSS)**

| **Variables in the Equation** | | | | | | | | | |
| --- | --- | --- | --- | --- | --- | --- | --- | --- | --- |
|  | | B | S.E. | Wald | df | Sig. | Exp(B) | 95% C.I.for EXP(B) | |
| Lower | Upper |
| Step 1a | NIHSS | .189 | .034 | 30.801 | 1 | .000 | 1.208 | 1.130 | 1.292 |
| Constant | -2.534 | .266 | 90.936 | 1 | .000 | .079 |  |  |
| a. Variable(s) entered on step 1: NIHSS. | | | | | | | | | |

* NIHSS= National Institutes of Health Stroke Scale
